# Supplementary material for: Bi-directional and shared epigenomic signatures following proton and 56Fe irradiation
Source: PubMed Central journal article supplement (PMC5579159; doi:10.1038/s41598-017-09191-4), 2017-08-31
Supplement: 41598_2017_9191_MOESM1_ESM.pdf [file 41598_2017_9191_MOESM1_ESM.pdf]

# Bi-directional and shared epigenomic signatures following proton and <sup>56</sup>Fe irradiation

Running title: Proton irradiation, cognition, DNA methylation, and gene expression

Soren Impey<sup>a, b, #</sup>, Timothy Jopson<sup>c</sup>, Carl Pelz<sup>a</sup>, Amanuel Tafessu<sup>a</sup>, Fatema Fareh<sup>a</sup>, Damian Zuloaga<sup>d</sup>, Tessa Marzulla<sup>d</sup>, Lara-Kirstie Riparip<sup>c</sup>, Blair Stewart<sup>d</sup>, Susanna Rosi<sup>e</sup>, Mitchell S. Turker<sup>e</sup>, and Jacob Raber<sup>d, f, #</sup>

<sup>a</sup> Oregon Stem Cell Center and Department of Pediatrics, Oregon Health and Science University, Portland, OR 97239 USA

<sup>b</sup> Department of Cell and Developmental Biology, Oregon Health and Science University, Portland, OR 97239 USA

<sup>c</sup> Brain and Spinal Injury Center, Departments of Neurological Surgery and Physical Therapy and Rehabilitation Science, University of California, San Francisco, San Francisco, CA, 94110 USA

<sup>d</sup> Department of Behavioral Neuroscience, Oregon Health and Science University, Portland, OR 97239 USA

<sup>e</sup> Oregon Institute of Occupational Health Sciences and Department of Molecular and Medical Genetics, Oregon Health and Science University, Portland, OR 97239

<sup>f</sup> Departments of Neurology and Radiation Medicine, Division of Neuroscience ONPRC, Oregon Health and Science University, Portland, OR 97239, USA

## Proton 2w 0 Gy

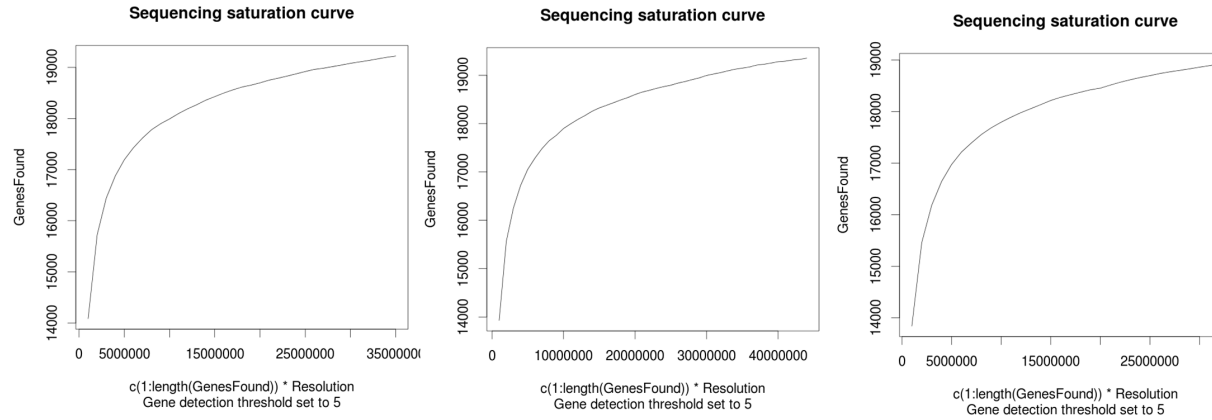

## Proton 2w 1 Gy

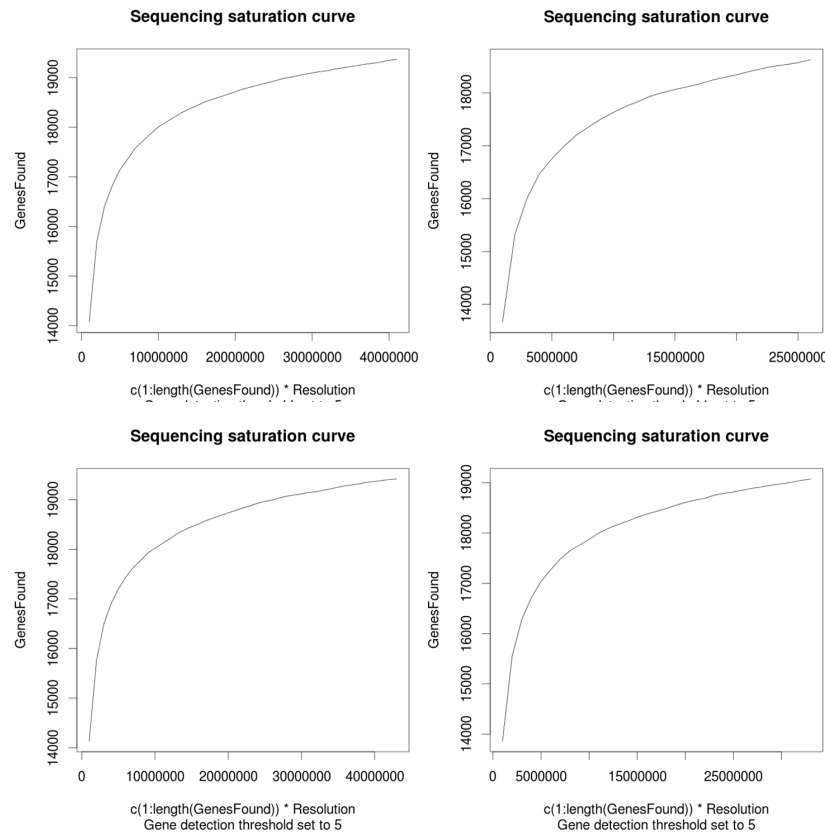

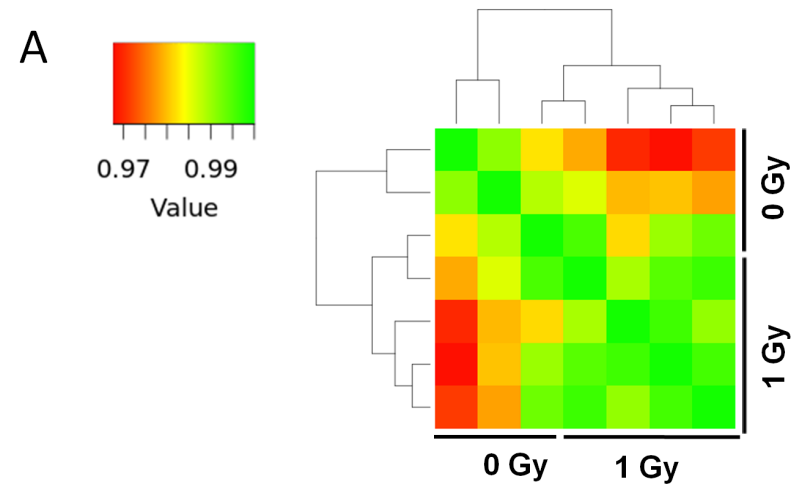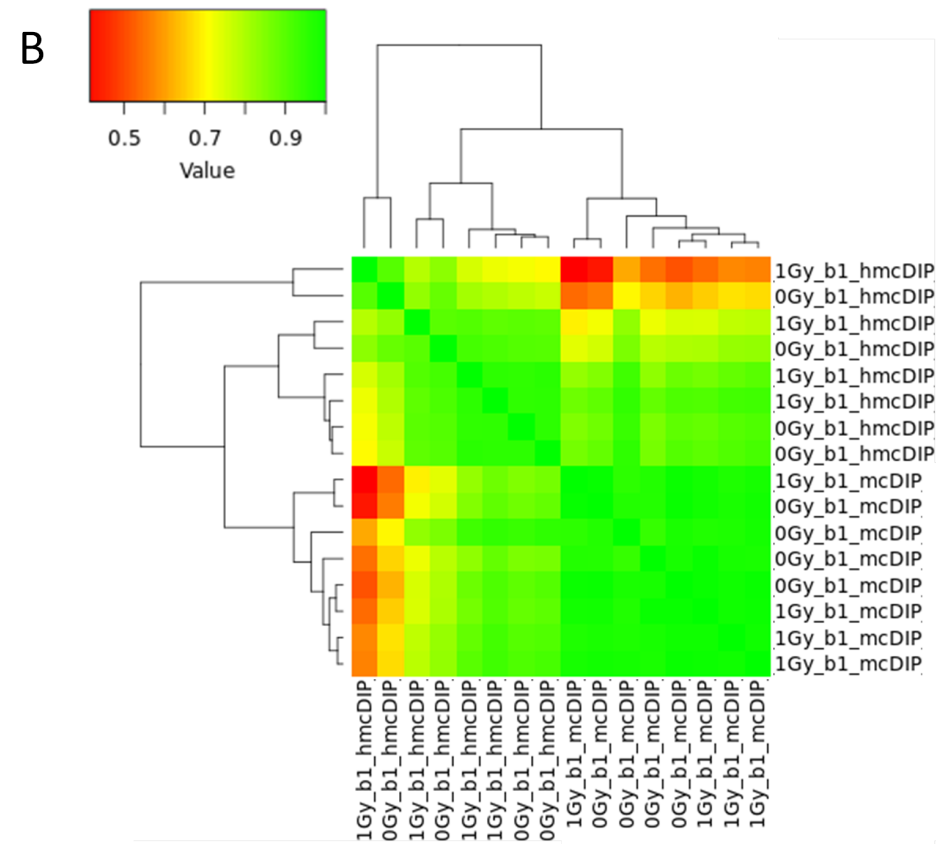

## Scatter Plot 5mC vs 5hmC

Prot\_34\_00y\_b1\_hmcDIP\_5MqES\_Norm\_vs\_Prot\_38\_10y\_b1\_mcDIP\_5MqES\_Norm\_Log2ScatterPlot.t

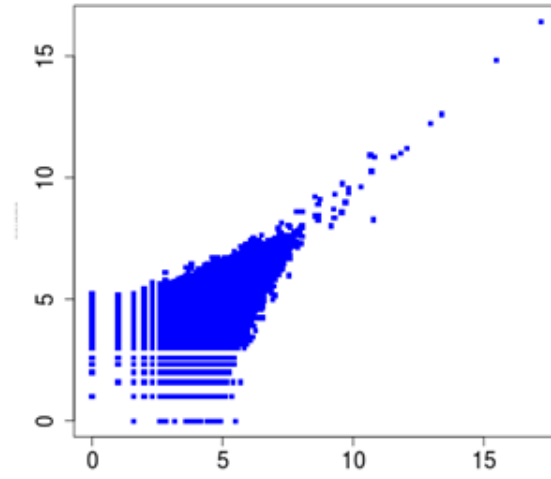

Pearson's  $r = 0.62939546843014$

Prot\_39\_10y\_b1\_hmcDIP\_5MqES\_Norm\_vs\_Prot\_37\_00y\_b1\_mcDIP\_5MqES\_Norm\_Log2ScatterPlot.t

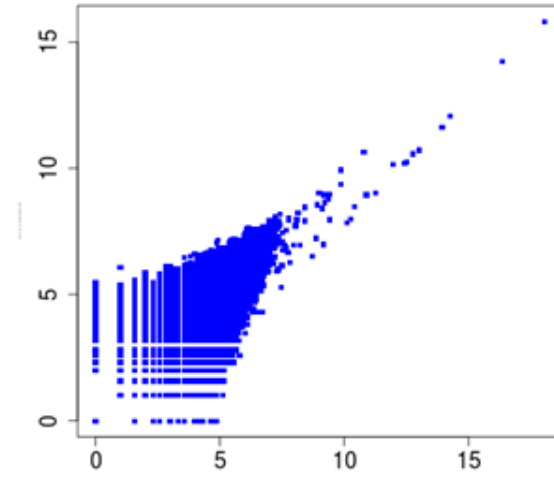

Pearson's  $r = 0.59537351672238$

## Scatter Plot 5hmC vs 5hmC

Prot\_40\_00y\_b1\_hmcDIP\_5MqES\_Norm\_vs\_Prot\_36\_10y\_b1\_hmcDIP\_5MqES\_Norm\_Log2ScatterPlot.t

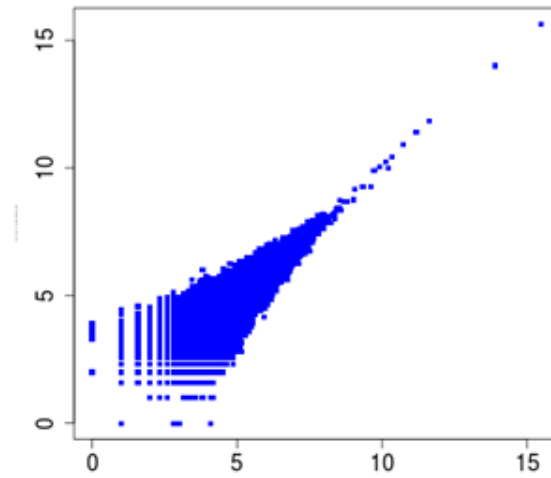

Pearson's  $r = 0.851789162925588$

Prot\_36\_10y\_b1\_hmcDIP\_5MqES\_Norm\_vs\_Prot\_35\_00y\_b1\_hmcDIP\_5MqES\_Norm\_Log2ScatterPlot.t

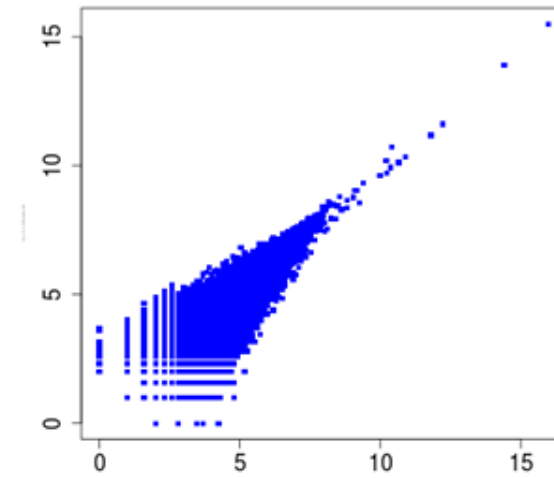

Pearson's  $r = 0.808963633319283$

### Hippocampus 5mC-DIP-Seq

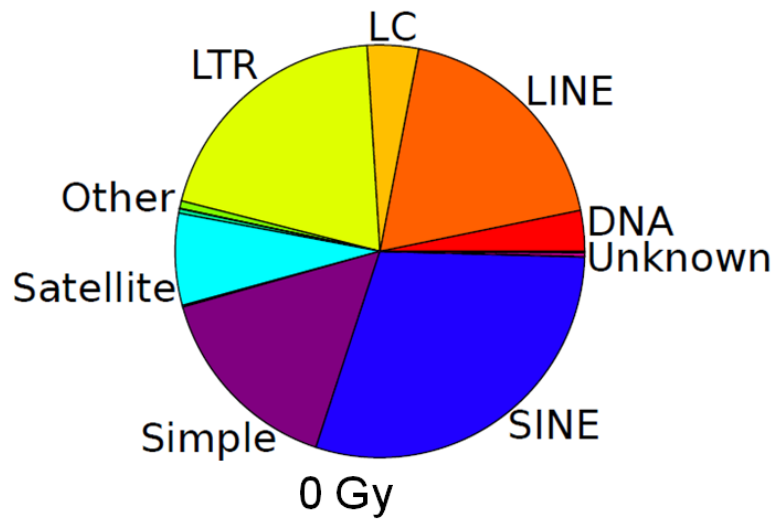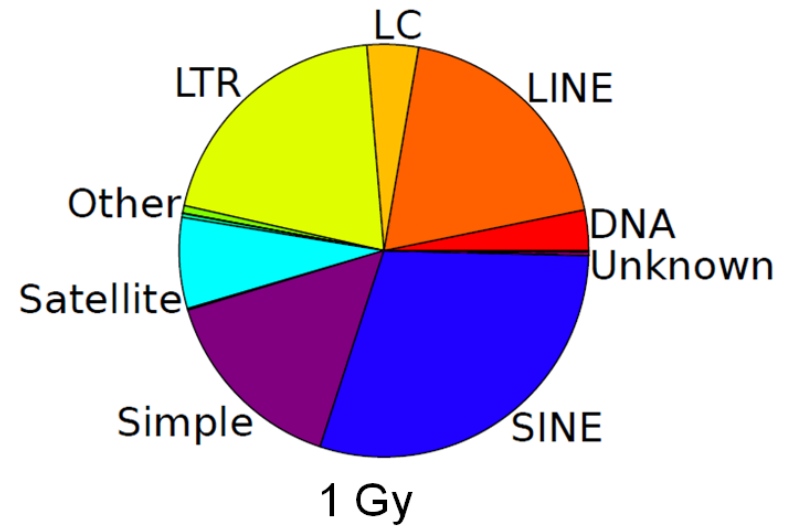

### Hippocampus 5hmC-DIP-Seq

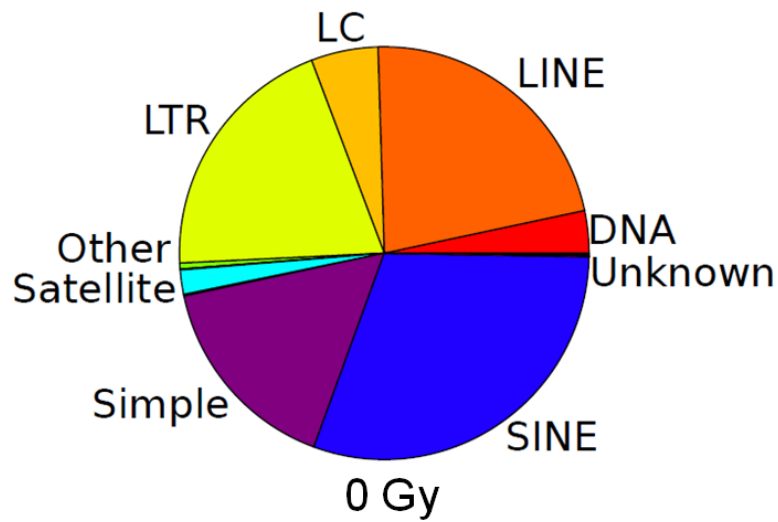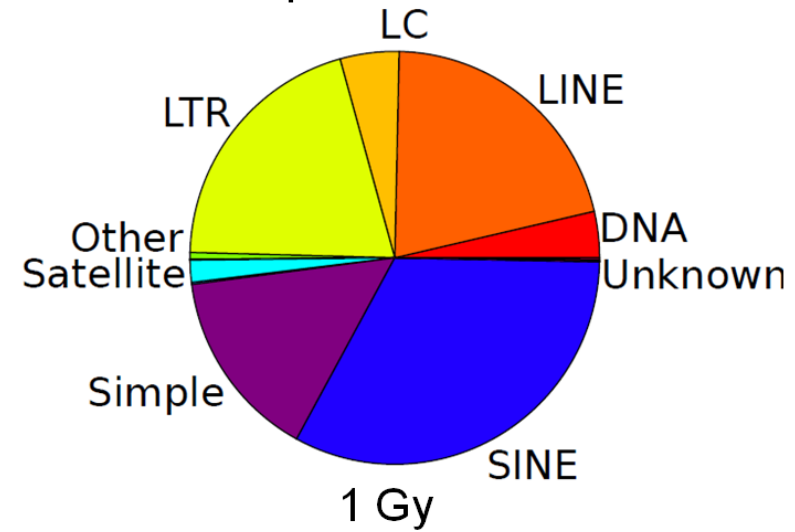

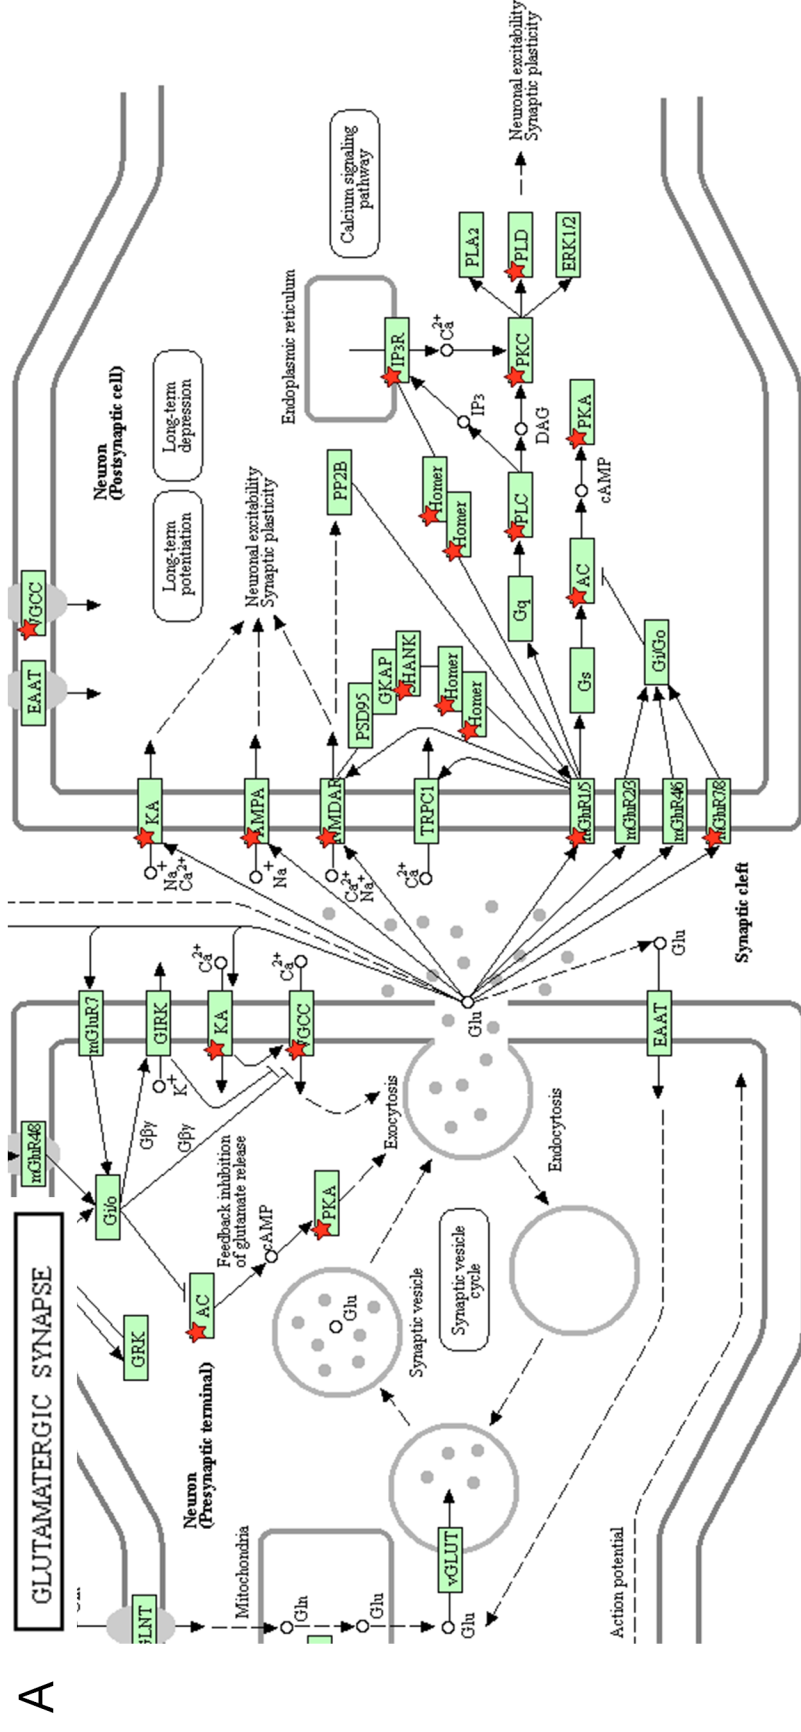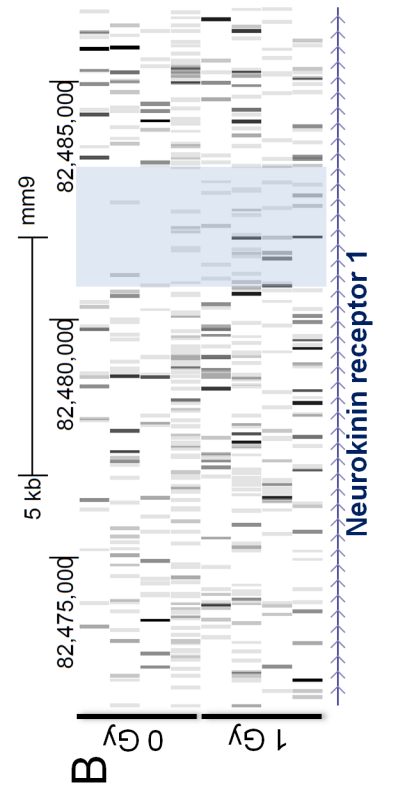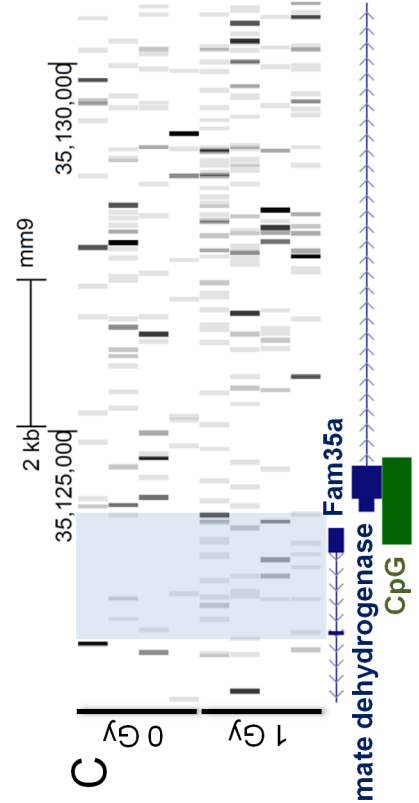

**A**

**B**

**C**

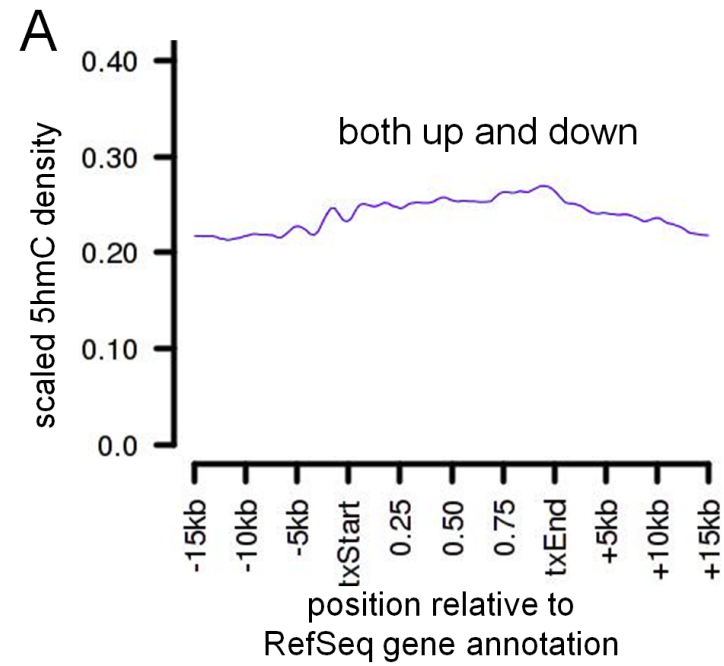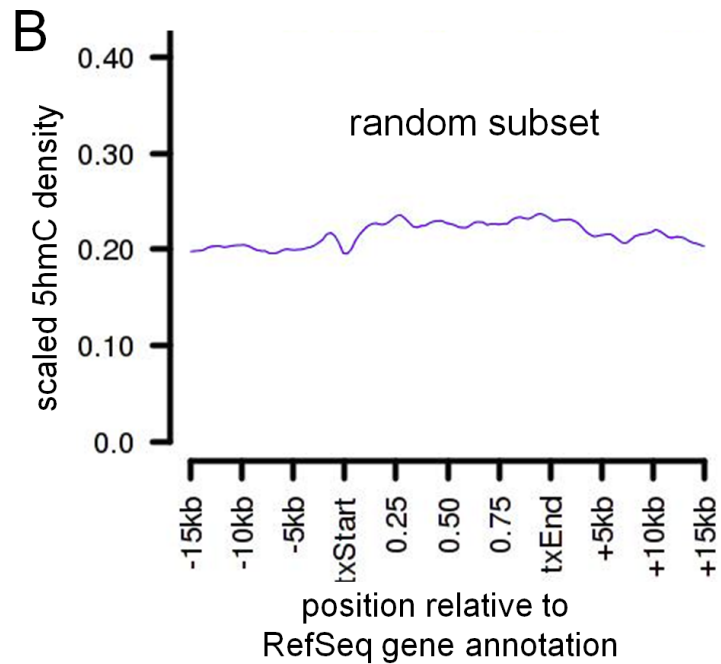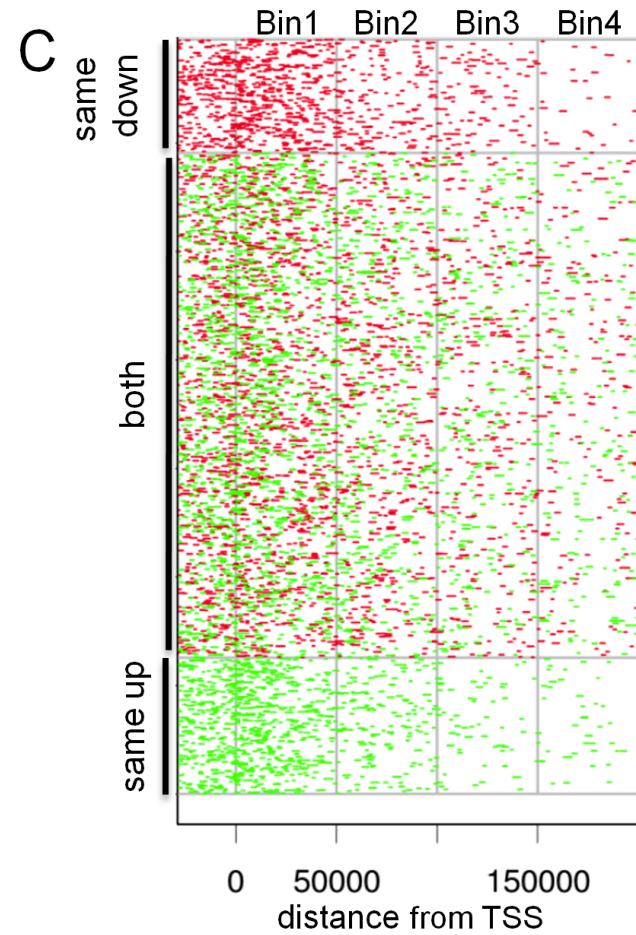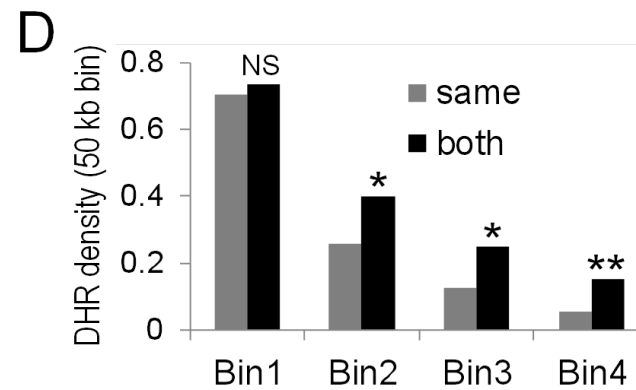

Suppl Fig 6

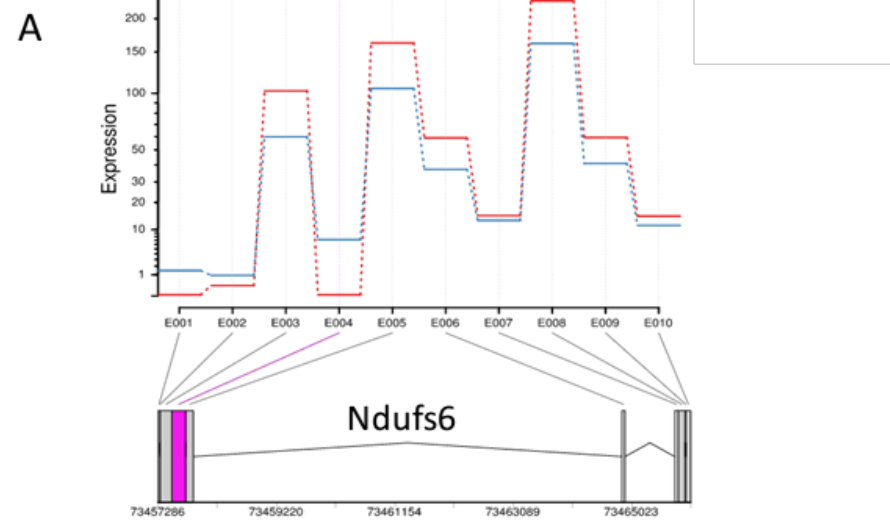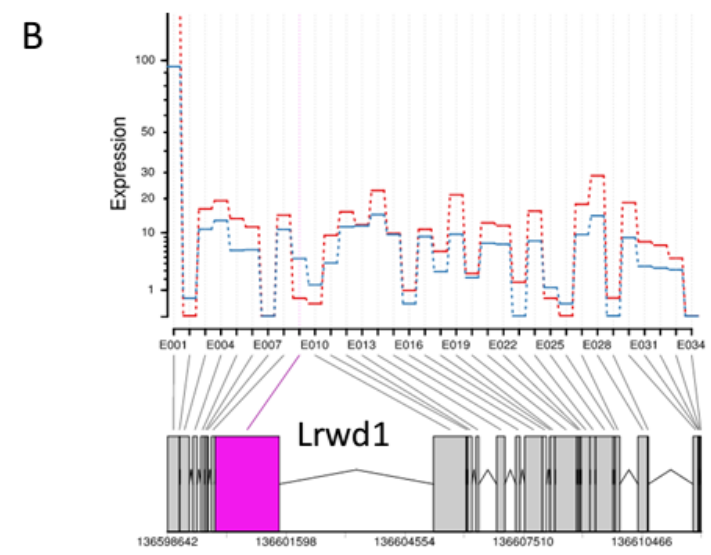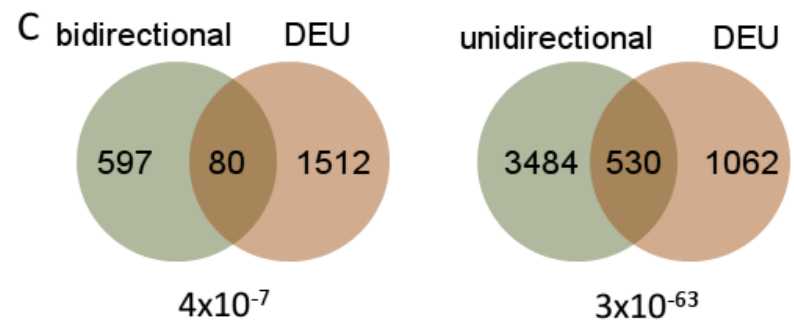

Suppl Fig 7



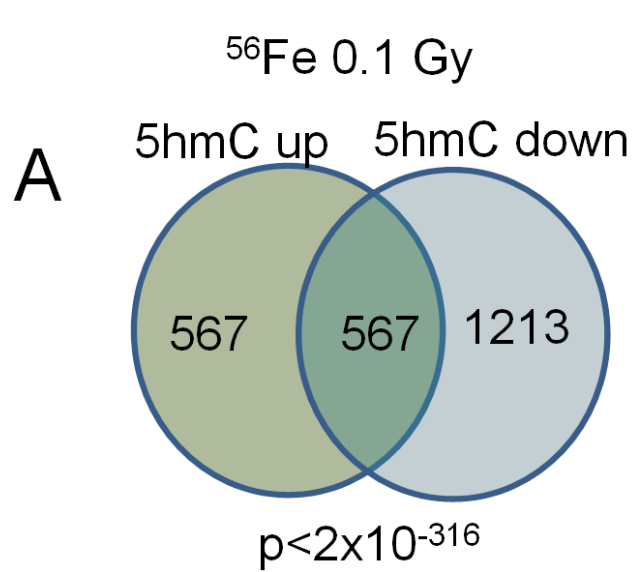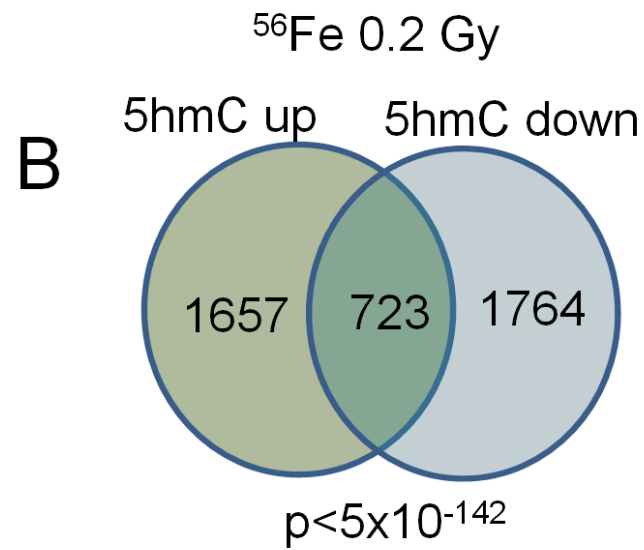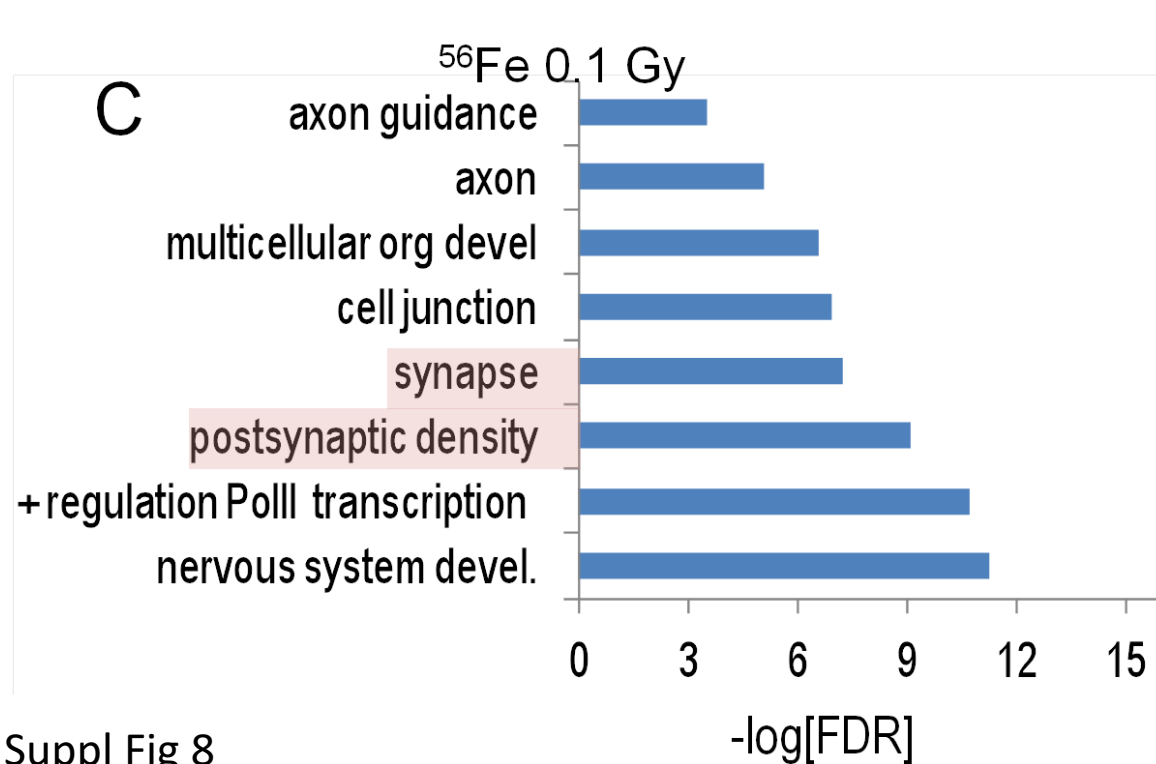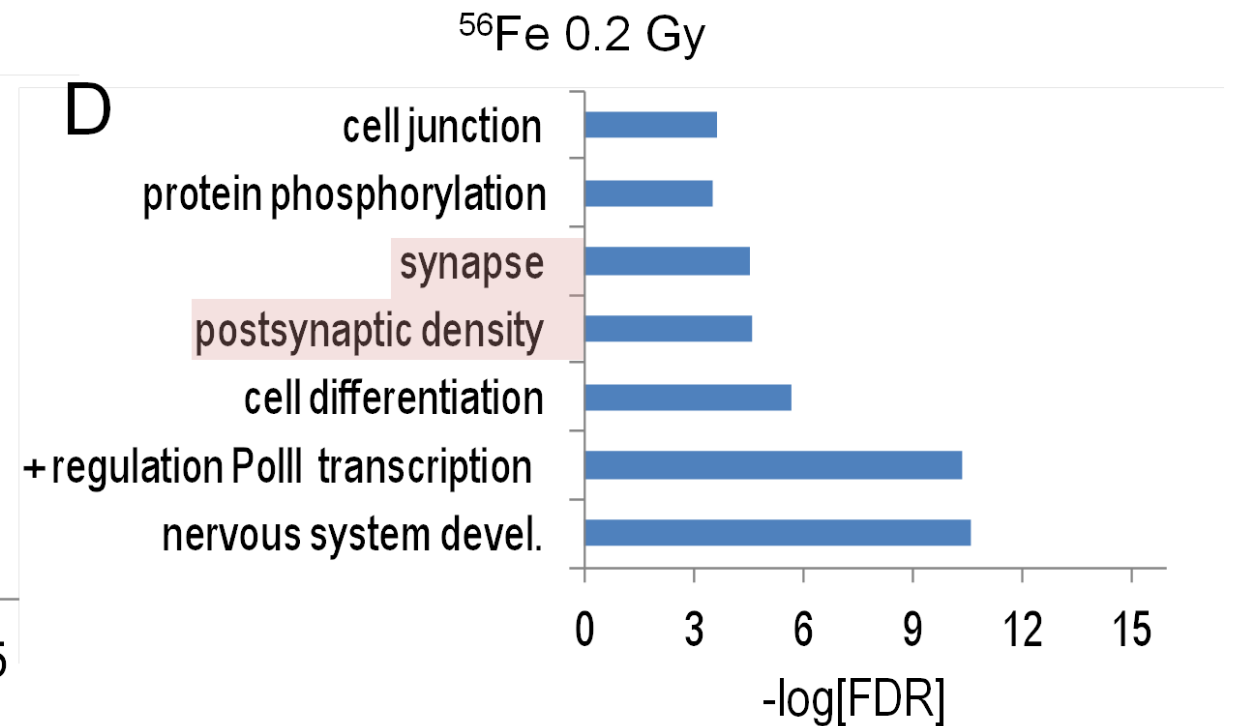

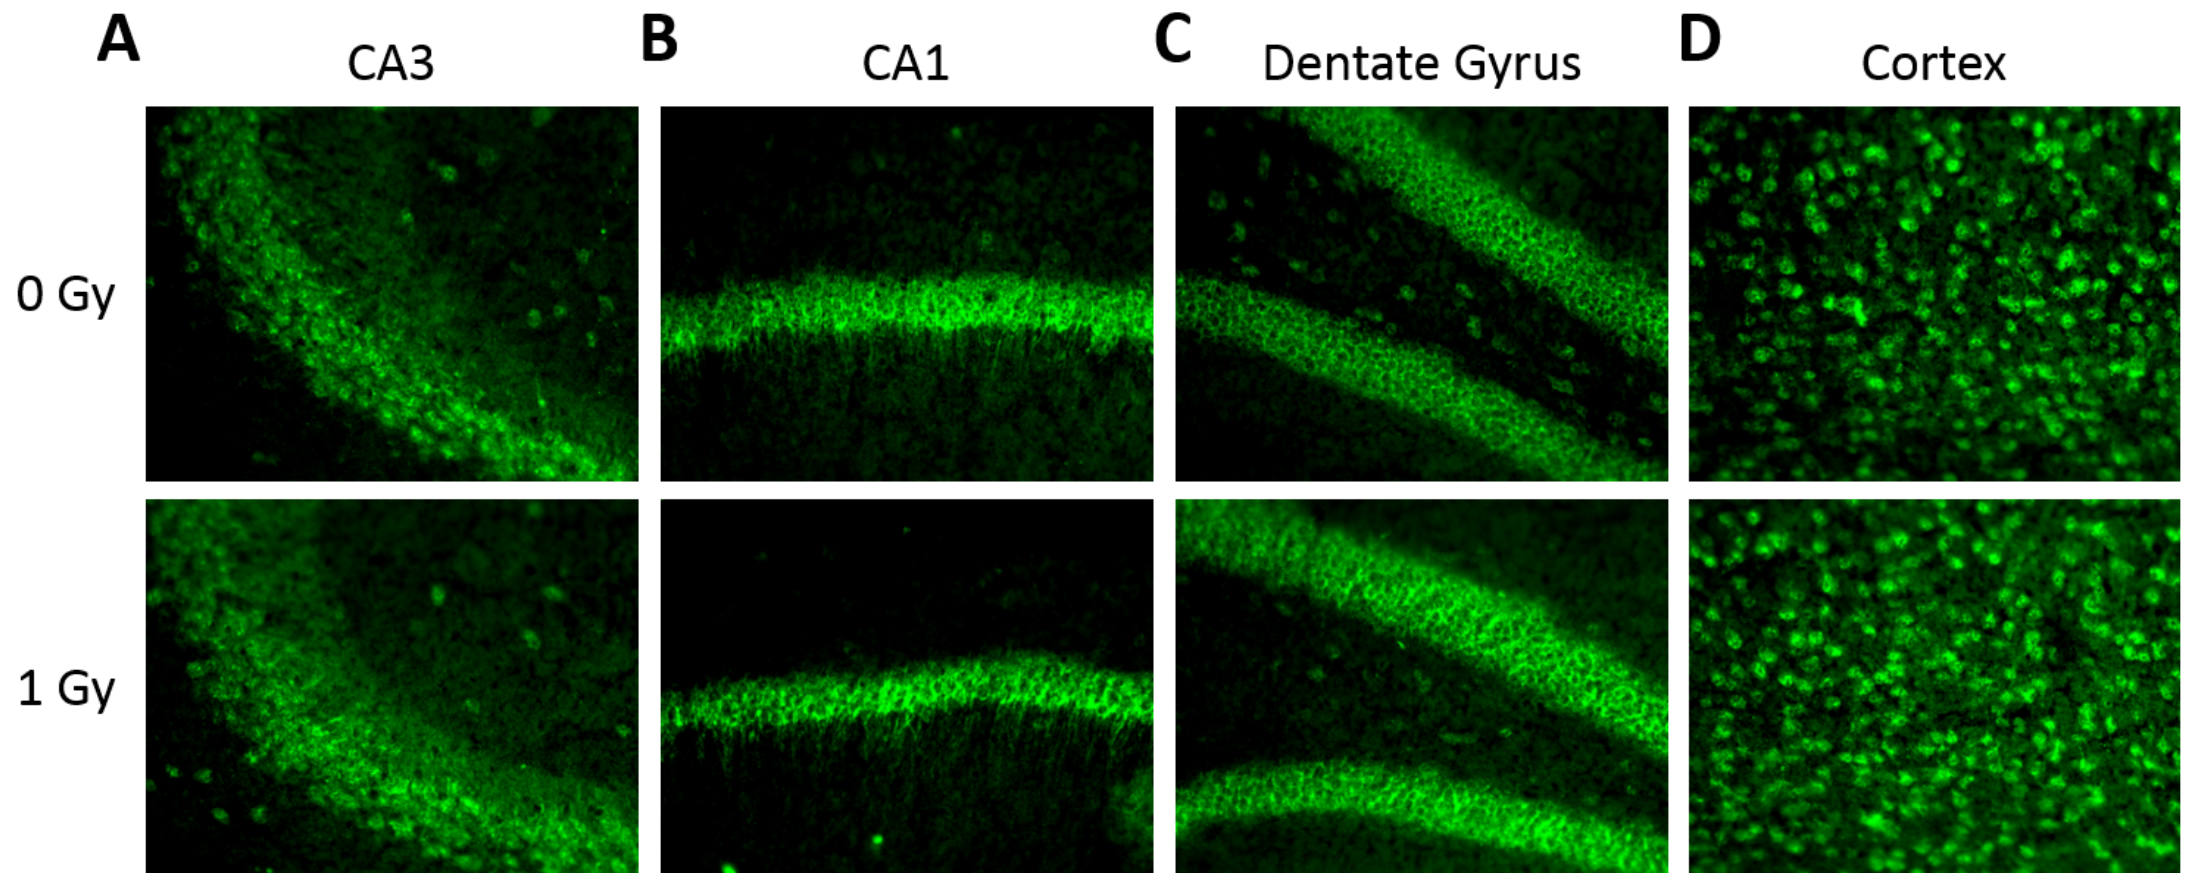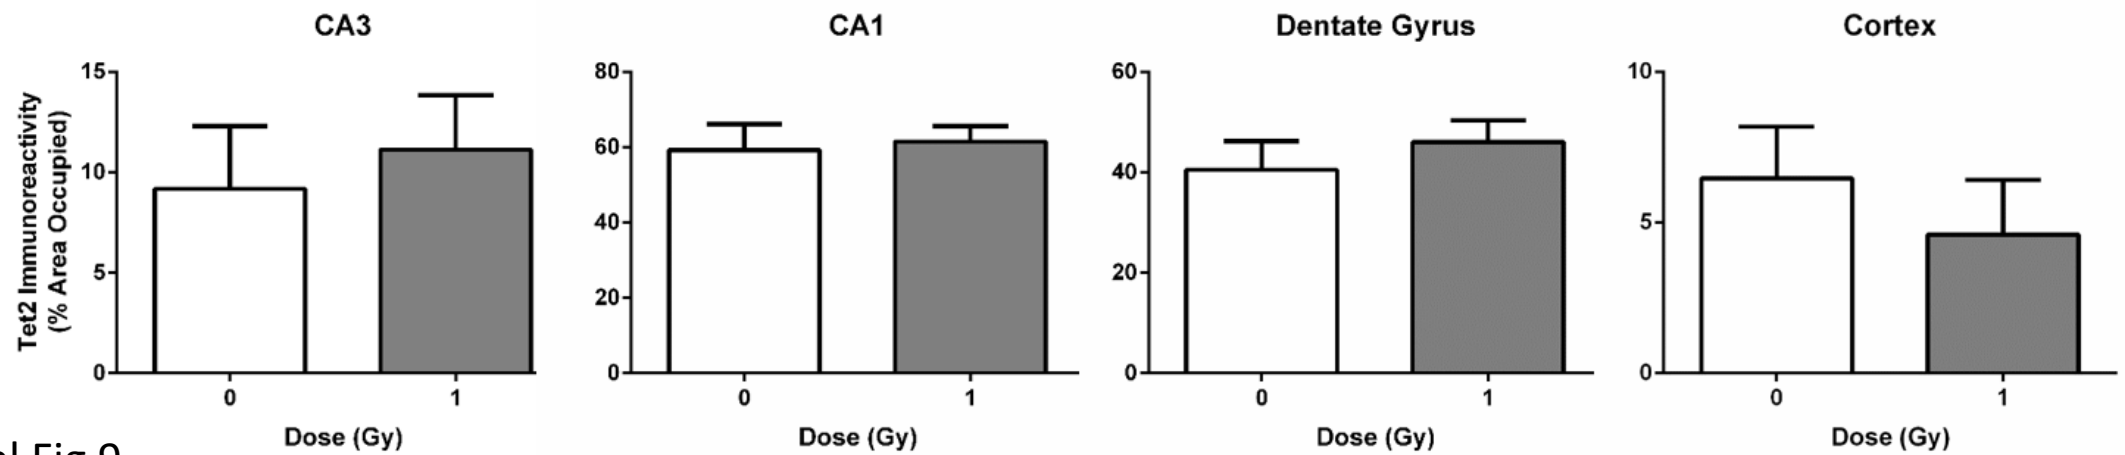

Suppl Fig 9

## Suppl. Figure Legends

**Suppl. Fig. 1.** RNA-Seq saturation curves at depth of 5 reads per annotated gene.

**Suppl. Fig. 2.** (A) Pearson correlation matrix of log<sub>2</sub>-transformed RNA-Seq exonic reads. The color scale shows Pearson's  $r$ . (B) Pearson correlation matrix of 5mC- and 5hmC-DIP-Seq reads from indicated samples. Reads were selected from regions of enrichment (FDR-adjusted  $p < 0.001$ ) merged across all samples.

**Suppl. Fig. 3.** Example correlation scatter plots for some of the comparisons in Suppl. Fig. 2B.

**Suppl. Fig. 4.** Both 5mC and 5hmC regions are enriched at major parasitic repeats (LINEs, SINEs, LTR-based repeated) with 5mC showing the expected enrichment at Satellite repeats.

**Suppl. Fig. 5.** KEGG analyses revealed that synapse pathways are significantly associated with increased DHRs. The KEGG database was developed by the Kanehisa Laboratories, as described <sup>72</sup>.

**Suppl. Fig. 6.** A and B. Similar global 5hmC density levels at genes with overlapping up and down DHRs versus a random subset of up alone or down alone. C. Heatmap shows up (green)

and down (red) DHRs from a subset of genes that are >200 kb in genomic length, have two up (same up), two down (same down), or an up and down (both) DHR, and are then randomly sorted by the directionality of intragenic DHRs (horizontal grey line). The indicated bins (grey lines) delineate 50 kb regions distal to the transcriptional start site (TSS). D. A permutation statistic identifies a highly significant increase in DHR density in distal bins for genes with “both” versus genes with “same” DHR distributions (see C).  $*p < 1 \times 10^{-4}$  and  $**p < 2 \times 10^{-7}$ .

**Suppl. Fig. 7.** Differential exon usage analysis. A and B. Gene ideograms depict significantly regulated genes with exon expression levels for 0 Gy and 1 Gy indicated by the red and blue lines respectively. The significantly-regulated exon is highlighted. C. Venn diagram depicts intersection of 677 bidirectional DHRs and 4014 unidirectional DHRs with annotated differentially-expressed exons ( $p < 0.01$ ). The fisher exact test was used to assess significance.

**Suppl. Fig. 8.** Reanalyzing the  $^{56}\text{Fe}$  data using a similar bioinformatics pipeline as used in the current study, we once again observed a strikingly significant overlap between increased and decreased DHRs at the same genes for both the 0.1 Gy and 0.2 Gy doses.

**Suppl. Fig. 9.** Comparable Tet2 immunoreactivity in sham-irradiated and proton irradiated mice at the 2-week time point. **A.** Tet2 immunoreactivity levels in the CA3 region of the hippocampus.  $*p < 0.05$  versus sham-irradiation. **B.** Tet2 immunoreactivity levels in the CA1

region of the hippocampus. **C.** Tet2 immunoreactivity levels in the dentate gyrus. **D.** Tet2 immunoreactivity levels in the cortex.  $N = 20$  mice/dose.
